# Supplementary material
Source: PubMed Central journal article supplement (PMC7805312)
Supplement: advancesADV2020003353-suppl1.pdf [file advancesADV2020003353-suppl1.pdf]

**Supplemental Table 1.** List of candidates included and excluded from predictor variable selection

**Included variables prior to transplant**

- Age (every 10-year increase)
- Sex (male, female)
- Race (white, non-white)
- Body mass index (categorical with BMI <30, 30-34.9, 35-39.9, 40+)
- Prior autologous transplant (yes, no)
- Disease type (lymphoma = NHL/HD, leukemia and others)
- Donor match/relatedness (matched related, matched unrelated, mismatched related, mismatched unrelated, umbilical cord)
- Conditioning regimen (myeloablative, non-myeloablative)
- GVHD prophylaxis (tacrolimus, cyclosporine, calcineurin inhibitor + sirolimus, other)

**Included variables on or prior to day 30 (index date)**

- VTE history (PE/LE-DVT, catheter associated DVT, none)
- GVHD history (grade 3-4, grade 0-2)
- Bacterial infection history (yes, no)
- Fungal infection history (yes, no)
- CMV reactivation history (yes, no)
- Admission status at day 30 (inpatient, outpatient)

**Included continuous laboratory variables at day 30 +/- 7d (index date)**

- All candidate laboratory variables will be tested as either continuous variables or categorical variables at 50<sup>th</sup> and 90<sup>th</sup> percentile cut-offs
- White blood cell count (<5, 5-10.9, 11+)
- Hemoglobin (<10, 10-11.9, 12+)
- Platelet (<100, 100-199, 200+)
- Creatinine (<1, 1-1.49, 1.5+)
- Total bilirubin (<0.7, 0.7-1.69, 1.7+)

**Excluded variables (and rationale)**

- HCT comorbidity index (HCI-CI): missingness >5%
- Karnofsky performance status: missingness >5%
- Timing of historical VTE: colinear with type of VTE (i.e. most of the catheter associated DVTs occurred very recently whereas most of the PE/LE-DVT occurred very remotely)
- Absolute neutrophil count at day 30: colinear with WBC
- Coagulation labs (INR, PT, PTT, or D-dimer): missingness >5%

**Supplemental Table 2.** Variables selected from stepwise logistic regressions after locking in history of VTE and acute GVHD based on prior knowledge

**Model #1: use original variable parametrization (c-statistic = 0.72)**

| Proposed Risk Factor       | OR (95% CI)      | Standard Error |
|----------------------------|------------------|----------------|
| History of VTE             |                  |                |
| None (n=1570)              | Baseline         |                |
| CR-DVT (n=81)              | 2.10 (0.80-5.52) | 1.036          |
| PE or LE-DVT (n=52)        | 2.60 (0.94-7.19) | 1.350          |
| Acute GVHD before 30d      |                  |                |
| None or mild GVHD (n=1576) | Baseline         |                |
| Grade 3-4 (n=127)          | 1.69 (0.75-3.82) | 0.702          |
| Inpatient admission (30d)  |                  |                |
| No (n=1423)                | Baseline         |                |
| Yes (n=280)                | 2.07 (1.08-3.98) | 0.690          |
| Diagnosis of lymphoma      |                  |                |
| No (n=1494)                | Baseline         |                |
| Yes (n=209)                | 3.46 (1.88-6.36) | 1.074          |
| Obesity                    |                  |                |
| BMI <30 (n=1268)           | Baseline         |                |
| BMI 30-34.9 (n=289)        | 1.11 (0.54-2.31) | 0.414          |
| BMI 35-39.9 (n=85)         | 2.52 (1.00-6.33) | 1.184          |
| BMI 40+ (n=61)             | 2.63 (0.96-7.16) | 1.345          |
| WBC at day 30              |                  |                |
| WBC <5 (n=837)             | Baseline         |                |
| WBC 5-10.9 (n=664)         | 1.30 (0.70-2.41) | 0.410          |
| WBC 11+ (n=202)            | 2.21 (1.05-4.65) | 0.839          |
| Constant                   | 0.013            | 0.004          |

**Model #2: use continuous variables without categorization (c-statistic = 0.72)**

| Proposed Risk Factor       | OR (95% CI)      | Standard Error |
|----------------------------|------------------|----------------|
| History of VTE             |                  |                |
| None (n=1570)              | Baseline         |                |
| CR-DVT (n=81)              | 2.08 (0.79-5.44) | 1.020          |
| PE or LE-DVT (n=52)        | 2.47 (0.89-6.89) | 1.294          |
| Acute GVHD before 30d      |                  |                |
| None or mild GVHD (n=1576) | Baseline         |                |
| Grade 3-4 (n=127)          | 1.70 (0.75-3.85) | 0.709          |
| Inpatient admission (30d)  |                  |                |
| No (n=1423)                | Baseline         |                |
| Yes (n=280)                | 2.12 (1.11-4.04) | 0.698          |
| Diagnosis of lymphoma      |                  |                |
| No (n=1494)                | Baseline         |                |
| Yes (n=209)                | 3.43 (1.87-6.31) | 1.065          |
| BMI at baseline            |                  |                |
| For every 1 increase       | 1.05 (1.01-1.10) | 0.022          |
| WBC at day 30              |                  |                |
| For every 1 increase       | 1.02 (0.99-1.07) | 0.020          |
| Constant                   | 0.004            | 0.003          |

**Model #3: use simplified cut-off (for final score estimation) (c-statistic = 0.71)**

| <b>Proposed Risk Factor</b> | <b>OR (95% CI)</b> | <b>Standard Error</b> |
|-----------------------------|--------------------|-----------------------|
| History of VTE              |                    |                       |
| None (n=1570)               | Baseline           |                       |
| CR-DVT (n=81)               | 2.10 (0.80-5.53)   | 1.037                 |
| PE or LE-DVT (n=52)         | 2.54 (0.92-7.05)   | 1.322                 |
| Acute GVHD before 30d       |                    |                       |
| None or mild GVHD (n=1576)  | Baseline           |                       |
| Grade 3-4 (n=127)           | 1.74 (0.77-3.91)   | 0.719                 |
| Inpatient admission (30d)   |                    |                       |
| No (n=1423)                 | Baseline           |                       |
| Yes (n=280)                 | 2.02 (1.06-3.86)   | 0.666                 |
| Diagnosis of lymphoma       |                    |                       |
| No (n=1494)                 | Baseline           |                       |
| Yes (n=209)                 | 3.47 (1.89-6.38)   | 1.077                 |
| Obesity                     |                    |                       |
| BMI <35 (n=1557)            | Baseline           |                       |
| BMI 35+ (n=146)             | 2.54 (1.26-5.13)   | 0.910                 |
| WBC at day 30               |                    |                       |
| WBC <11 (n=1501)            | Baseline           |                       |
| WBC 11+ (n=202)             | 1.95 (0.99-3.84)   | 0.674                 |
| Constant                    | 0.015              | 0.003                 |

**Supplemental Table 3.** Variables selected from LASSO cross-validation

| ID   | lambda   | No. of<br>nonzero<br>coef. | CV mean<br>deviance |                       |             |
|------|----------|----------------------------|---------------------|-----------------------|-------------|
| 2    | .0165138 | 1                          | 1.368851            | A 0.lymphoma          |             |
| 5    | .0124921 | 2                          | 1.31162             | A 0.inpatient_day30   |             |
| 6    | .0113823 | 3                          | 1.286448            | A 0.vte_hx2           |             |
| 8    | .0094498 | 4                          | 1.239995            | A 0.agvh_severe_day30 |             |
| 9    | .0086103 | 6                          | 1.218326            | A 2.vte_hx2           | 4.bmi_cat   |
| 10   | .0078454 | 7                          | 1.196694            | A 3.bmi_cat           |             |
| 12   | .0065134 | 8                          | 1.166528            | A cr_30d              |             |
| 14   | .0054075 | 9                          | 1.149977            | A wbc_30d             |             |
| * 15 | .0049271 | 9                          | 1.149564            | U                     |             |
| 16   | .0044894 | 13                         | 1.151643            | A 1.race2<br>plt_30d  | 2.race2     |
| 17   | .0040906 | 15                         | 1.155249            | A age_cat             | 2.regimen   |
| 18   | .0037272 | 18                         | 1.161854            | A 2.ppx2              | 3.ppx2      |
| 19   | .0033961 | 19                         | 1.168556            | A 2.don_match         |             |
| 21   | .0028195 | 20                         | 1.180657            | A 0.aspergillus_day30 |             |
| 23   | .0023408 | 21                         | 1.192089            | A 0.regimen           |             |
| 26   | .0017707 | 23                         | 1.207116            | A 3.race2             | 3.don_match |
| 32   | .0010133 | 24                         | 1.229605            | A 0.bacteremia_day30  |             |
| 35   | .0007665 | 25                         | 1.237122            | A 0.prior_auto        |             |
| 37   | .0006364 | 26                         | 1.241255            | A 0.cmv_day30         |             |

\* lambda selected by cross-validation.

Lasso penalized regression was used as an alternative to stepwise regression for variable selection to avoid overfitting. The lasso penalty parameter lambda was selected through 10-fold cross-validation (CV) to minimize the CV mean deviance. The covariate with non-zero coefficients at optimal lambda included all the variables selected in the stepwise regression in addition to creatinine values at 30 days. This prompted us to investigate creatine further using various continuous and categorical transformation. However, we could not detect either a statistical signal or to improve fit the final multivariable model. As creatinine remained a weak covariate chosen by lasso, we decided against fitting in into the final model.

**Supplemental Figure 1.** Calibration plot and Hosmer-Lemeshow goodness of fit test for the final model

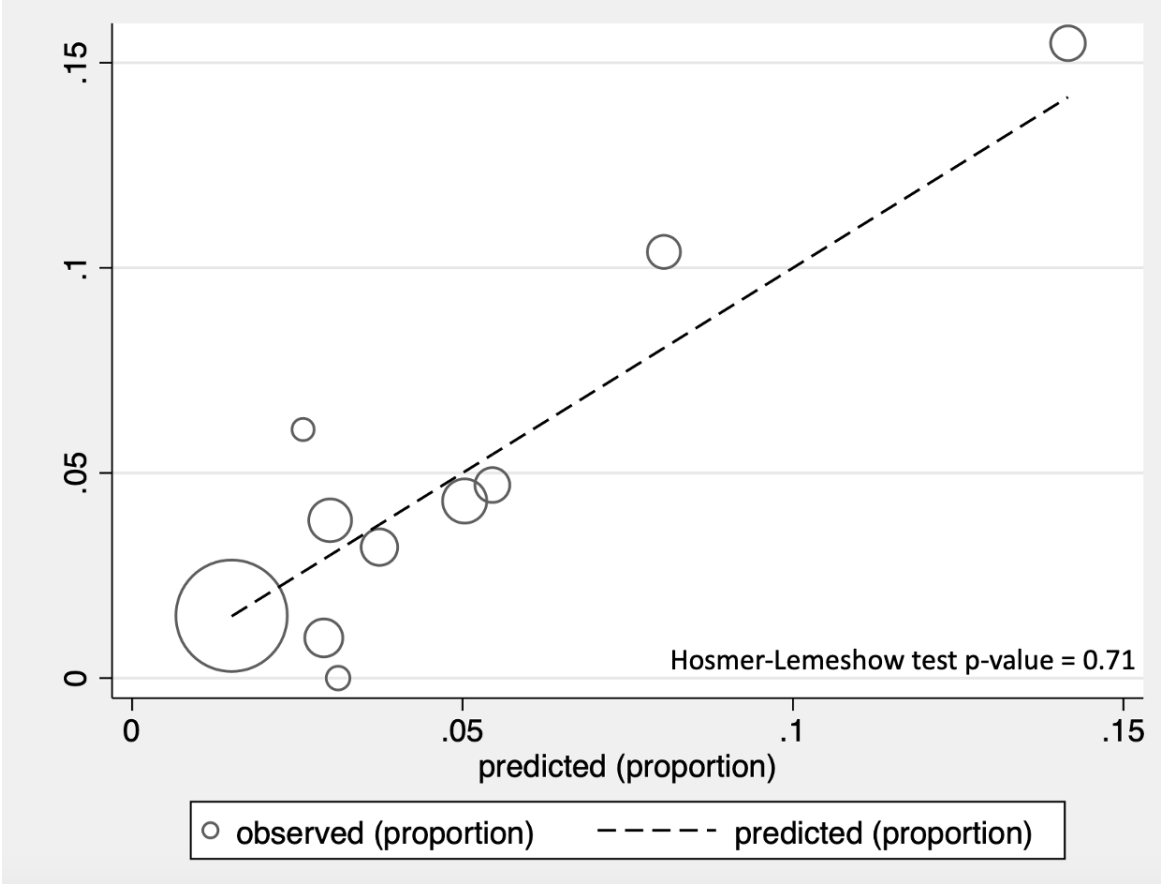

| Section/Topic                | Item | Checklist Item                                                                                                                                                                                        | Page                          |
|------------------------------|------|-------------------------------------------------------------------------------------------------------------------------------------------------------------------------------------------------------|-------------------------------|
| <b>Title and abstract</b>    |      |                                                                                                                                                                                                       |                               |
| Title                        | 1    | Identify the study as developing and/or validating a multivariable prediction model, the target population, and the outcome to be predicted.                                                          | 1                             |
| Abstract                     | 2    | Provide a summary of objectives, study design, setting, participants, sample size, predictors, outcome, statistical analysis, results, and conclusions.                                               | 3                             |
| <b>Introduction</b>          |      |                                                                                                                                                                                                       |                               |
| Background and objectives    | 3a   | Explain the medical context (including whether diagnostic or prognostic) and rationale for developing or validating the multivariable prediction model, including references to existing models.      | 4                             |
|                              | 3b   | Specify the objectives, including whether the study describes the development or validation of the model or both.                                                                                     | 5                             |
| <b>Methods</b>               |      |                                                                                                                                                                                                       |                               |
| Source of data               | 4a   | Describe the study design or source of data (e.g., randomized trial, cohort, or registry data), separately for the development and validation data sets, if applicable.                               | 5                             |
|                              | 4b   | Specify the key study dates, including start of accrual; end of accrual; and, if applicable, end of follow-up.                                                                                        | 5, 6                          |
| Participants                 | 5a   | Specify key elements of the study setting (e.g., primary care, secondary care, general population) including number and location of centres.                                                          | 5                             |
|                              | 5b   | Describe eligibility criteria for participants.                                                                                                                                                       | 5, 6                          |
|                              | 5c   | Give details of treatments received, if relevant.                                                                                                                                                     | --                            |
| Outcome                      | 6a   | Clearly define the outcome that is predicted by the prediction model, including how and when assessed.                                                                                                | 7                             |
|                              | 6b   | Report any actions to blind assessment of the outcome to be predicted.                                                                                                                                | --                            |
| Predictors                   | 7a   | Clearly define all predictors used in developing or validating the multivariable prediction model, including how and when they were measured.                                                         | Supp Table                    |
|                              | 7b   | Report any actions to blind assessment of predictors for the outcome and other predictors.                                                                                                            | --                            |
| Sample size                  | 8    | Explain how the study size was arrived at.                                                                                                                                                            | Fig. 1                        |
| Missing data                 | 9    | Describe how missing data were handled (e.g., complete-case analysis, single imputation, multiple imputation) with details of any imputation method.                                                  | 8                             |
| Statistical analysis methods | 10a  | Describe how predictors were handled in the analyses.                                                                                                                                                 | 8                             |
|                              | 10b  | Specify type of model, all model-building procedures (including any predictor selection), and method for internal validation.                                                                         | 8, 9                          |
|                              | 10d  | Specify all measures used to assess model performance and, if relevant, to compare multiple models.                                                                                                   | 8, 9                          |
| Risk groups                  | 11   | Provide details on how risk groups were created, if done.                                                                                                                                             | 8, 9                          |
| <b>Results</b>               |      |                                                                                                                                                                                                       |                               |
| Participants                 | 13a  | Describe the flow of participants through the study, including the number of participants with and without the outcome and, if applicable, a summary of the follow-up time. A diagram may be helpful. | Fig 1                         |
|                              | 13b  | Describe the characteristics of the participants (basic demographics, clinical features, available predictors), including the number of participants with missing data for predictors and outcome.    | 9, 10                         |
| Model development            | 14a  | Specify the number of participants and outcome events in each analysis.                                                                                                                               | 10, 11                        |
|                              | 14b  | If done, report the unadjusted association between each candidate predictor and outcome.                                                                                                              | --                            |
| Model specification          | 15a  | Present the full prediction model to allow predictions for individuals (i.e., all regression coefficients, and model intercept or baseline survival at a given time point).                           | Table 2, Supplemental Table 2 |
|                              | 15b  | Explain how to use the prediction model.                                                                                                                                                              | 11, 12                        |
| Model performance            | 16   | Report performance measures (with CIs) for the prediction model.                                                                                                                                      | 12                            |
| <b>Discussion</b>            |      |                                                                                                                                                                                                       |                               |
| Limitations                  | 18   | Discuss any limitations of the study (such as nonrepresentative sample, few events per predictor, missing data).                                                                                      | 17                            |
| Interpretation               | 19b  | Give an overall interpretation of the results, considering objectives, limitations, and results from similar studies, and other relevant evidence.                                                    | 13, 14, 15                    |
| Implications                 | 20   | Discuss the potential clinical use of the model and implications for future research.                                                                                                                 | 13, 16, 17                    |
| <b>Other information</b>     |      |                                                                                                                                                                                                       |                               |
| Supplementary information    | 21   | Provide information about the availability of supplementary resources, such as study protocol, Web calculator, and data sets.                                                                         | --                            |
| Funding                      | 22   | Give the source of funding and the role of the funders for the present study.                                                                                                                         | 18                            |
